# Supplementary material for: From Nature to Synthetic Compounds: Novel 1(N),2,3 Trisubstituted-5-oxopyrrolidines Targeting Multiple Myeloma Cells
Source: MDPI journal article supplement (doi:10.3390/ijms232113061), 2022-10-27

## Supplementary Material

### Standard screening protocol of mobile phase

The standard screening protocol of mobile phase composition used for the first studies on enantioseparation of trans-12 is reported in Supplementary Table S1.

| Entry | Mobile Phase Composition |            |         |
|-------|--------------------------|------------|---------|
|       | n-Hexane                 | 2-propanol | Ethanol |
| 1     | 90                       | 10         |         |
| 2     | 50                       | 50         |         |
| 3     |                          | 100        |         |
| 4     |                          |            | 100     |
| 5     | 90                       |            | 10      |

**Supplementary Table S1.** Standard screening protocol: mobile phase composition.

### Analytical Screening

Results of the analytical screening are reported in Tables 2 and are expressed as retention (k), selectivity ( $\alpha$ ) and resolution (Rs) factors.

| CSPs                |                             |      |          |      |                           |       |          |      |
|---------------------|-----------------------------|------|----------|------|---------------------------|-------|----------|------|
| Eluent <sup>a</sup> | Chiralpak IA <sup>b,c</sup> |      |          |      | Chiralpak IC <sup>c</sup> |       |          |      |
|                     | k1                          | k2   | $\alpha$ | RS   | k1                        | k2    | $\alpha$ | RS   |
| A                   | 2.42                        | 2.70 | 1.11     | 1.37 | 4.64                      | 17.01 | 3.68     | 19.5 |
| B                   | 1.35                        | 1.52 | 1.11     | 1.13 | 2.68                      | 8.49  | 3.17     | 15.6 |
| C                   | 0.97                        | 1.09 | 1.12     | 0.77 | 1.92                      | 6.07  | 3.16     | 13.4 |
| D                   | 0.72                        | 0.78 | 1.09     | -    | 1.39                      | 4.17  | 3.00     | 10.6 |
| E                   | 0.57                        | 0.61 | 1.06     | -    | 1.10                      | 3.15  | 2.87     | 10.0 |
| F                   | 0.31                        | -    | -        | -    | 0.62                      | 1.52  | 2.45     | 5.49 |
| G <sup>d</sup>      | 0.24                        | -    | -        | -    | 0.25                      | 0.49  | 1.96     | 1.46 |
| H <sup>d</sup>      | 0.23                        | -    | -        | -    | 0.28                      | -     | -        | -    |
| I                   | 1.02                        | -    | -        | -    | 1.09                      | 1.77  | 1.63     | 3.02 |
| L                   | 1.52                        | -    | -        | -    | 1.48                      | 2.56  | 1.73     | 3.44 |
| M                   | 2.35                        | 2.46 | 1.05     | -    | 2.41                      | 4.39  | 1.82     | 7.37 |

**Supplementary Table S2.** <sup>a</sup>Eluent composition: A, n-Hex/ IPA (90:10 v/v); B, n-Hex/IPA (85:15 v/v); C, n-Hex/IPA (80:20 v/v); D, n-Hex/IPA (75:25 v/v); E, n-Hex/IPA (70:30 v/v); F, n-Hex/IPA (50:50 v/v); G, IPA (100); H, EtOH (100); I, n-Hex/EtOH (80:20 v/v); L, n-Hex/EtOH (85:15 v/v); M, n-Hex/EtOH (90:10 v/v); <sup>b</sup> Mobile phase was added with 0.1% DEA; <sup>c</sup> Mobile phase was added with 0.3% TFA; Flow rate: 1.0 mL/min; <sup>d</sup> Flow rate: 0.5 mL/min; Concentration: 1 mg/mL; Injection volume: 10  $\mu$ L; detection at 220 nm.

## Biological investigation

RPMI 8226 cells were treated with different concentrations (10, 100 and 500  $\mu\text{M}$ ) of each compound and, after 24 hours, proteasome activity assay was performed.

**Supplementary Figure S1.** Proteasome activity of RPMI 8226 cells treated with (2*R*,3*R*/2*S*,3*S*)-13, 14, 16 and 20. Proteasome activity was evaluated in cells treated for 24 hours with different concentrations (10, 100 and 500  $\mu\text{M}$ ) of compounds. The graphs represent the mean proteasome activity  $\pm$  SD, compared to untreated controls, arbitrarily set to 100%. \*\*  $p < 0.01$  vs CTRL.

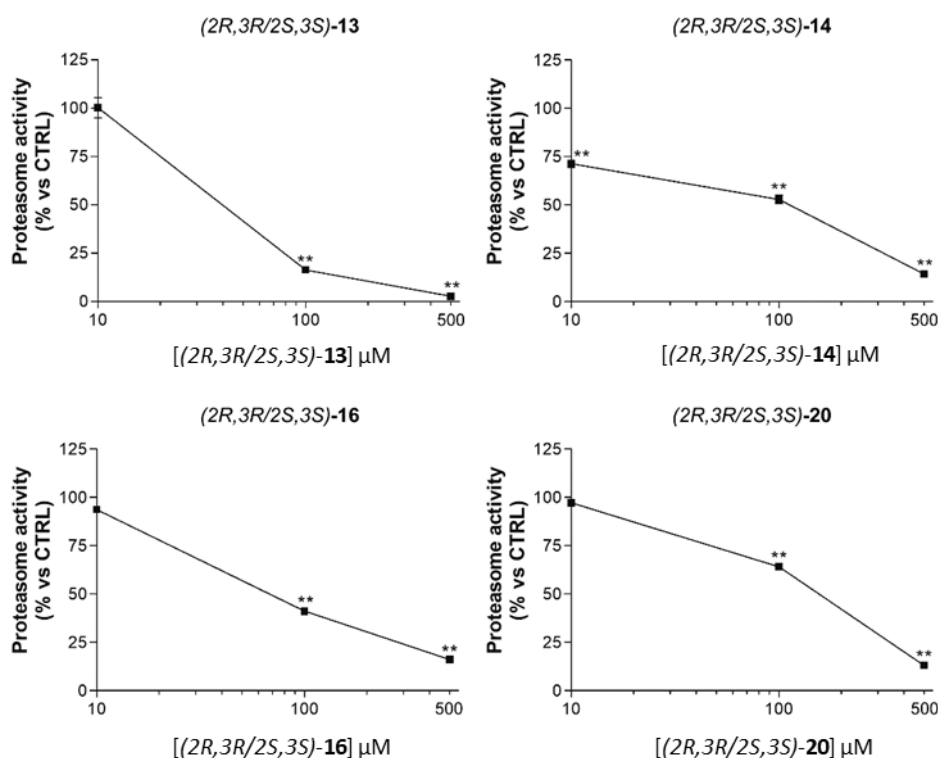

RPMI 8226 cells treated with BTZ 1, 5 and 10 nM were used as positive control for all experiments.

**Supplementary Figure S2.** A) MTT assay of BTZ in RPMI 8226 cells. Cells were not treated (CTRL) or treated with different concentrations of BTZ (1, 5 and 10 nM) for 24, 48 and 72 hours. The graphs represent the mean percentage  $\pm$  SD of cell viability, compared to untreated controls, arbitrarily set to 100%. \*\*  $p < 0.01$  vs CTRL; B) Trypan blue vital count assay of RPMI 8226 cells treated with BTZ. Cells were not treated (CTRL) or treated with different concentrations of compounds (1, 5 and 10 nM) for 24 hours. The graphs represent the mean cell number  $\pm$  SD of viable and dead cells. \*\*  $p < 0.01$  vs CTRL; C) Proteasome activity of RPMI 8226 cells treated with BTZ. Proteasome activity was evaluated in cells treated for 24 hours with different concentrations (1, 5 and 10 nM) of BTZ. The graphs represent the mean proteasome activity  $\pm$  SD, compared to untreated controls, arbitrarily set to 100%. \*\*  $p < 0.01$  vs CTRL.

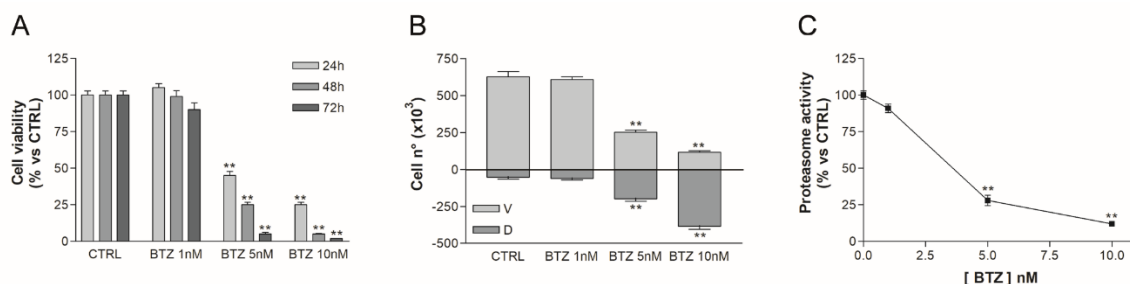

Supplement: s1 [file s1]
